# Supplementary material
Source: Springer Nature journal article supplement (https://www.springermedizin.de/resource/supplementary/12885_2009_2099_MOESM5_ESM.pdf/9460524)

TACGCCA<sup>★</sup>CCAGCTCC

TACGCCACA<sup>★</sup>AGCTCC

TACGCCA<sup>★</sup>CCAGCTCC

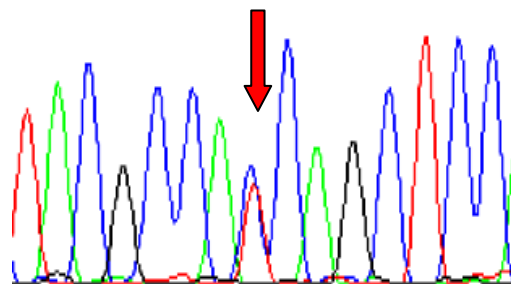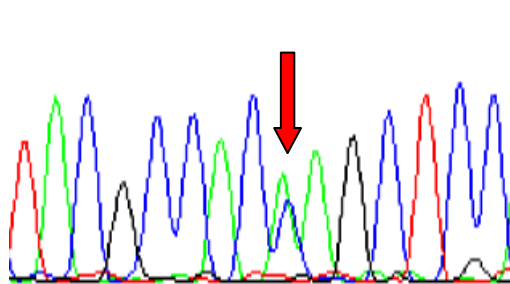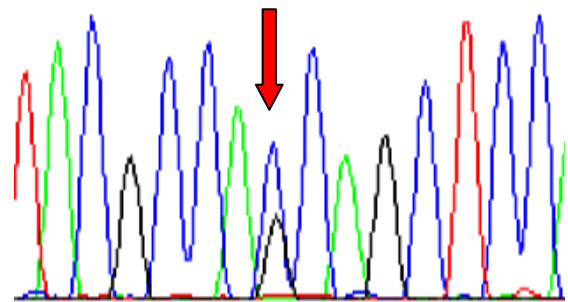

TACGCCACCAGCTCC

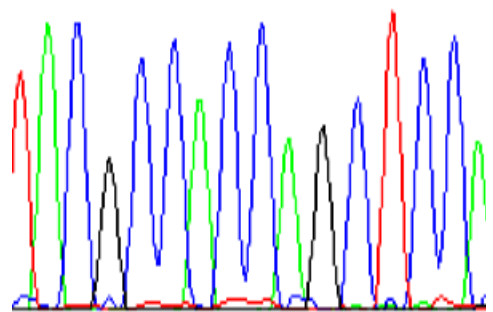

Supplement: MOESM5 [file 9460524]
